# Supplementary material for: PRAME induces genomic instability in uveal melanoma
Source: Research Square preprint supplement (doi:10.21203/rs.3.rs-2861359/v1), 2023-04-26
Supplement: Supplementary file 1 [file ecf60d1dfebede21d07b9219.pdf]

## **SUPPLEMENTARY INFORMATION**

### **PRAME induces genomic instability in uveal melanoma**

Stefan Kurtenbach<sup>1,2,3,5</sup>, Margaret I. Sanchez<sup>1,2,3,5</sup>, Jeffim Kuznetsoff<sup>1,2,3</sup>, Daniel A. Rodriguez<sup>1,2,3</sup>, Natalia Weich<sup>2</sup>, James Dollar<sup>1,2,3</sup>, Anthony Cruz<sup>1,2,3</sup>, Sarah Kurtenbach<sup>1,2,3</sup>, Matthew G. Field<sup>1,2,3</sup>, Michael A. Durante<sup>1,2,3</sup>, Christina Decatur<sup>1,2,3</sup>, Mahsa Sorouri<sup>4</sup>, Fan Lai<sup>2</sup>, Ramin Shiekhatter<sup>2</sup>, Daniel Pelaez<sup>1,2,3</sup>, Zelia M. Correa<sup>1,2,3</sup>, Ramiro E. Verdun<sup>2</sup>, and J. William Harbour<sup>4\*</sup>

<sup>1</sup>Bascom Palmer Eye Institute, <sup>2</sup>Sylvester Comprehensive Cancer Center, and <sup>3</sup>Interdisciplinary Stem Cell Institute, University of Miami Miller School of Medicine, Miami, FL; <sup>4</sup>Department of Ophthalmology and Simmons Comprehensive Cancer Center, University of Texas Southwestern Medical Center, Dallas, TX.

<sup>5</sup>These authors contributed equally.

\*Corresponding author: J. William Harbour, MD, Department of Ophthalmology and Simmons Comprehensive Cancer Center, University of Texas Southwestern Medical Center, 5323 Harry Hines Blvd., Dallas Texas 75390-9057

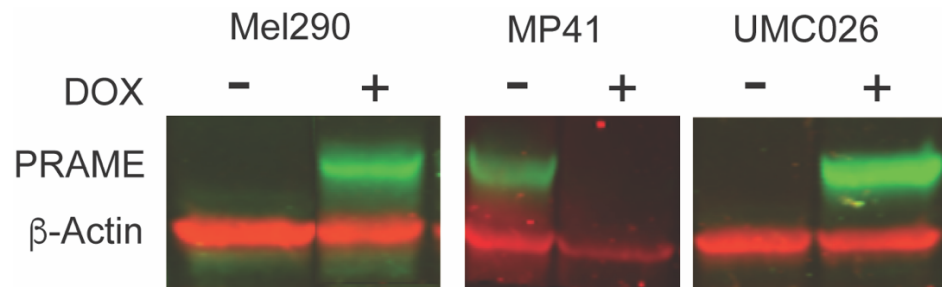

**Supplementary Figure 1.** Western blot to analyze PRAME and  $\beta$ -actin protein levels before and after 1 week of doxycycline (DOX) treatment in Mel290 cells with inducible PRAME expression construct, MP41 cells with inducible shRNA construct targeting PRAME, and uveal melanocytes (UMC) with inducible PRAME expression construct.

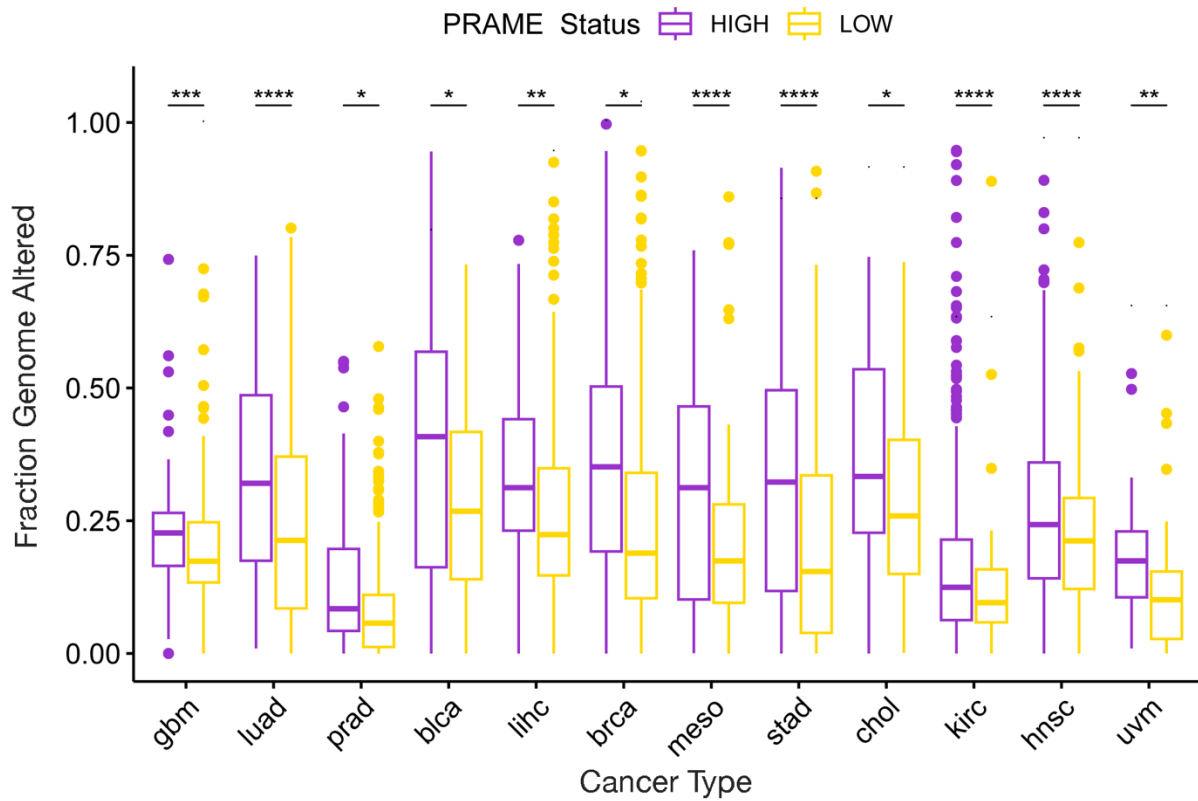

**Supplementary Figure 2.** Pan-Cancer analysis of fraction genome altered in association with increased PRAME expression in 12 cancer types from the Cancer Genome Atlas (TCGA). GMB, glioblastoma multiforme; LUAD, lung adenocarcinoma; PRAD, prostate adenocarcinoma, BLCA, bladder urothelial carcinoma, LIHC, liver hepatocellular carcinoma; BRCA, breast invasive carcinoma; MESO, mesothelioma; STAD, stomach adenocarcinoma; CHOL, cholangiocarcinoma; KIRC, kidney renal clear cell carcinoma; HNSC, head and neck squamous cell carcinoma, and uveal melanoma (UVM). Color indicates the PRAME expression status: purple, high expression; yellow, low expression. Significance: \*  $p < 0.05$ , \*\*  $p < 0.01$ , \*\*\*  $p < 0.001$ , \*\*\*\*  $p < 0.0001$ .

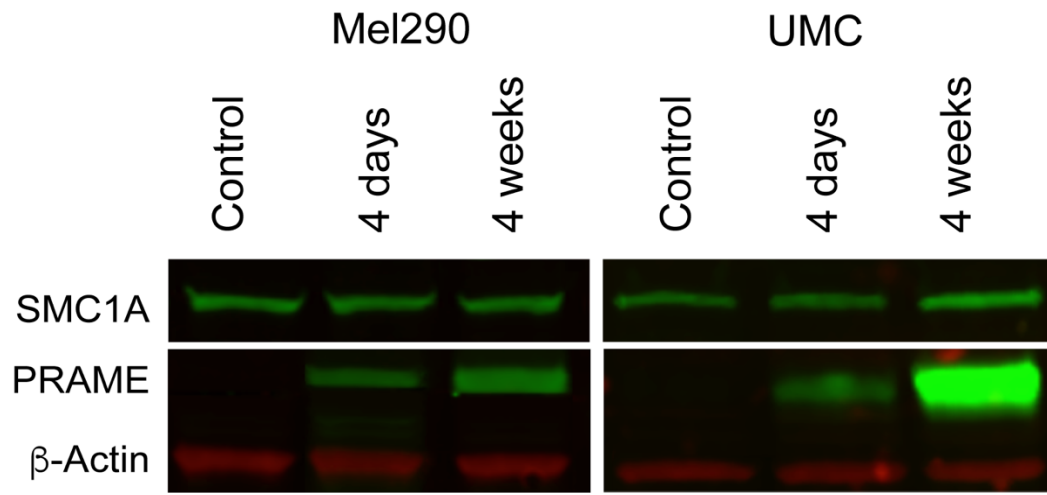

**Supplementary Figure 3.** Western blot to analyze SMC1A, PRAME, and  $\beta$ -actin protein levels. Depicted are the blots for Mel290 and human uveal melanocytes (UMC) following 4 days and 4 weeks of enforced PRAME expression.
